# Supplementary material
Source: Frontiers journal article supplement (https://www.frontiersin.org/articles/540067)
Supplement: Data_Sheet_1.PDF [file Data_Sheet_1.PDF]

Table 12 (Appendix): Languages, elevational demonstrative systems and references

Abbreviations:

U UP  
D DOWN  
L LEVEL  
A ACROSS

Part 1

| Language                                   | ISO 639-3<br>[glottocode] | Family         | Subfamily / Genus          | Area                                                    |
|--------------------------------------------|---------------------------|----------------|----------------------------|---------------------------------------------------------|
| Central Alaskan Yupik                      | esu                       | Eskimo-Aleut   | Yupik                      | Alaska and Greenland                                    |
| Kalaallisut (West Greenlandic)             | kal                       | Eskimo-Aleut   | Inuit                      | Alaska and Greenland                                    |
| Eastern Canadian Inuktitut (Aivilingmiut)  | ike                       | Eskimo-Aleut   | Inuit                      | Alaska and Greenland                                    |
| Tanacross                                  | tcb                       | Na-Dené        | Northern Athabaskan (Dene) | Alaska and Greenland                                    |
| Koyukon                                    | koy                       | Na-Dené        | Northern Athabaskan (Dene) | Alaska and Greenland                                    |
| Movima                                     | mzp                       | isolate        | isolate                    | Americas (excluding Alaska)                             |
| Pacaraos Quechua                           | qvp                       | Quechua        | Quechua I                  | Americas (excluding Alaska)                             |
| El Nayar Cora                              | crn                       | Uto-Aztecan    | Chorachol                  | Americas (excluding Alaska)                             |
| Zayse                                      | [zays1236]                | North Omotic   | Northwest Omoto            | Africa                                                  |
| Maale                                      | mdy                       | North Omotic   | Northwest Omoto            | Africa                                                  |
| Baskeet (Basketo)                          | bst                       | North Omotic   | Northwest Omoto            | Africa                                                  |
| Dawuro                                     | dwr                       | North Omotic   | Northwest Omoto            | Africa                                                  |
| Dime                                       | dim                       | South Omotic   |                            | Africa                                                  |
| Avar                                       | ava                       | East Caucasian | Avar                       | Caucasus                                                |
| Andi                                       | ani                       | East Caucasian | Andic                      | Caucasus                                                |
| Lak                                        | lbe                       | East Caucasian | Lak                        | Caucasus                                                |
| Sanzhi Dargwa                              | [sanz1248]                | East Caucasian | Dargic                     | Caucasus                                                |
| Khasi                                      | kha                       | Austroasiatic  | Khasi-Palaung              | Hindu Kush-Himalayas region                             |
| Bantawa                                    | bap                       | Sino-Tibetan   | Kiranti                    | Hindu Kush-Himalayas region                             |
| Yakkha                                     | ybh                       | Sino-Tibetan   | Kiranti                    | Hindu Kush-Himalayas region                             |
| Kurtöp (Kurtokha)                          | xkz                       | Sino-Tibetan   | East Bodish (Bodic)        | Hindu Kush-Himalayas region                             |
| Galo (and almost all other Tani languages) | adl                       | Sino-Tibetan   | Macro-Tani                 | Hindu Kush-Himalayas region                             |
| Lepcha                                     | lep                       | Sino-Tibetan   | Lepcha                     | Hindu Kush-Himalayas region                             |
| Jahai (Jehai)                              | jhi                       | Austroasiatic  | Aslian                     | Southeast Asia (excluding the Himalayas and New Guinea) |
| Muna                                       | mnb                       | Austronesian   | Malayo-Polynesian          | Southeast Asia (excluding the Himalayas and New Guinea) |

|                                 |                   |                             |                                  |                                                               |
|---------------------------------|-------------------|-----------------------------|----------------------------------|---------------------------------------------------------------|
| Buru                            | mhs               | Austronesian                | Malayo-Polynesian                | Southeast Asia<br>(excluding the Himalayas<br>and New Guinea) |
| Abui                            | abz               | Timor-Alor-<br>Pantar       | Alor-Pantar                      | Southeast Asia<br>(excluding the Himalayas<br>and New Guinea) |
| Blagar                          | beu               | Timor-Alor-<br>Pantar       | Alor-Pantar                      | Southeast Asia<br>(excluding the Himalayas<br>and New Guinea) |
| Makalero                        | mkz               | Timor-Alor-<br>Pantar       | Alor-Pantar                      | Southeast Asia<br>(excluding the Himalayas<br>and New Guinea) |
| Tidore                          | tvo               | North Halmahera             | (Papuan)                         | Southeast Asia<br>(excluding the Himalayas<br>and New Guinea) |
| Daga                            | dgz               | Dagan                       | (Papuan)                         | New Guinea                                                    |
| Sougb                           | mnx               | East Bird's Head            | (Papuan)                         | New Guinea                                                    |
| Manambu                         | mle               | Ndu                         | (Papuan)                         | New Guinea                                                    |
| Taulil (Tulil)                  | tuh               | Taulil-Butam                | (Papuan)                         | New Guinea                                                    |
| Dadibi                          | mps               | Teberan                     | (Papuan)                         | New Guinea                                                    |
| Hatam                           | had               | Hatam-Mansim                | (West Papuan)                    | New Guinea                                                    |
| Fore                            | for               | Nuclear Trans<br>New Guinea | Kainantu-Goroka                  | New Guinea                                                    |
| Yagaria, Hua dialect            | ygr<br>[huaa1250] | Nuclear Trans<br>New Guinea | Kainantu-Goroka                  | New Guinea                                                    |
| Usan                            | wnu               | Nuclear Trans<br>New Guinea | Madang                           | New Guinea                                                    |
| Tauya                           | tya               | Nuclear Trans<br>New Guinea | Madang                           | New Guinea                                                    |
| Nungon                          |                   | Nuclear Trans<br>New Guinea | Finisterre (Finisterre-<br>Huon) | New Guinea                                                    |
| Ma Manda                        | skc               | Nuclear Trans<br>New Guinea | Finisterre (Finisterre-<br>Huon) | New Guinea                                                    |
| Yupno (Yopno)                   | yut               | Nuclear Trans<br>New Guinea | Finisterre (Finisterre-<br>Huon) | New Guinea                                                    |
| Eipo (Eipomek)                  | eip               | Nuclear Trans<br>New Guinea | Mek                              | New Guinea                                                    |
| Yale (Kosarek Yale)             | kk1               | Nuclear Trans<br>New Guinea | Mek                              | New Guinea                                                    |
| Kewa (East dialect) /<br>Kewapi | [kewa1250]        | Nuclear Trans<br>New Guinea | Enga-Kewa-Huli                   | New Guinea                                                    |
| Nêlêmwa-Nixumwak                | nee               | Austronesian                | Oceanic, Kanak                   | Australia and Oceania                                         |
| Iaai                            | iai               | Austronesian                | Oceanic, Loyalty<br>Islands      | Australia and Oceania                                         |
| Dyirbal                         | dbl               | Australian                  | Pama–Nyungan                     | Australia and Oceania                                         |
| Ngiyambaa                       | wyb               | Australian                  | Pama–Nyungan                     | Australia and Oceania                                         |

Part 2

| Language                                   | Location of settlements                                                                                                                                                           | Geography   | Morphological form                  |
|--------------------------------------------|-----------------------------------------------------------------------------------------------------------------------------------------------------------------------------------|-------------|-------------------------------------|
| Central Alaskan Yupik                      | southwestern Alaska (USA), which is rather flat                                                                                                                                   | flat        | roots                               |
| Kalaallisut (West Greenlandic)             | historically spoken only in the coastal areas of the southwestern part of Greenland                                                                                               | flat        | roots                               |
| Eastern Canadian Inuktitut (Aivilingmiut)  | northwestern Hudson Bay Area (Canada)                                                                                                                                             | flat        | roots                               |
| Tanacross                                  | flat alluvial plain of the Tanana Valley between the Tanana River and the Alaska Range (Alaska, USA)                                                                              | flat        | roots                               |
| Koyukon                                    | along the Koyukuk and the middle Yukon River in western interior Alaska (USA), which is a flat area                                                                               | flat        | roots                               |
| Movima                                     | Beni Department, Bolivia (lowlands region, central settlement at 144 m)                                                                                                           | flat        | roots                               |
| Pacaraos Quechua                           | spoken until the middle of the 20th century in the Lima region (Peru), Chancay valley (3,300 to 3,700 m)                                                                          | mountainous | roots                               |
| El Nayar Cora                              | Sierra Madre Occidental, western Mexico (mountain peaks are Cerro Dolores with 2,480 m and Los Tecolotes with 2,360 m)                                                            | mountainous | suffixes and bound roots [two sets] |
| Zayse                                      | Zayse highlands (Southern Ethiopia), around two lakes that are located higher than 1,100 m                                                                                        | mountainous | roots                               |
| Maale                                      | the Maale area (Southern Ethiopia) is at an altitude ranging from about 1,000 m to 2,800 m                                                                                        | mountainous | roots                               |
| Baskeet (Basketo)                          | Gamo-Gofa Zone (Southern Ethiopia, 800 to 2,200 m)                                                                                                                                | mountainous | roots                               |
| Dawuro                                     | Dawuro Zone (Southern Ethiopia, around 1,300 m)                                                                                                                                   | mountainous | roots                               |
| Dime                                       | former North Omo Administrative Region (Southern Ethiopia; highest elevation is Mt. Smith, 2,533 m)                                                                               | mountainous | roots and bound roots [two sets]    |
| Avar                                       | Central Dagestan (Russian Federation), between 500 m (in the south) and 1,500 m above sea level                                                                                   | mountainous | roots                               |
| Andi                                       | Western Dagestan (Russian Federation), around 2,000 m above sea level                                                                                                             | mountainous | roots                               |
| Lak                                        | Central Dagestan (Russian Federation), around 1,500 m above sea level                                                                                                             | mountainous | roots                               |
| Sanzhi Dargwa                              | Central Dagestan (Russian Federation), around 1,500 m above sea level                                                                                                             | mountainous | roots                               |
| Khasi                                      | Khasi Hills (highest peak is Lum Shyllong which is 1,968 meters) and Jaintia Hills region of Meghalaya (India)                                                                    | mountainous | roots                               |
| Bantawa                                    | Bhojpur district, Eastern Nepal (around 1,600 m)                                                                                                                                  | mountainous | roots                               |
| Yakkha                                     | Eastern Nepal, village of Tumok (around 1,500 m) above sea level; villages generally spread over several hundred meters of altitude, because of fields located between the houses | mountainous | roots                               |
| Kurtöp (Kurtokha)                          | Northeastern Bhutan, at 1,200 to 2,600 m                                                                                                                                          | mountainous | roots                               |
| Galo (and almost all other Tani languages) | area from central Arunachal Pradesh within the Eastern Himalaya (North East India, 5,000 to                                                                                       | mountainous | roots                               |

|                      |                                                                                                                                                                                                      |             |                          |
|----------------------|------------------------------------------------------------------------------------------------------------------------------------------------------------------------------------------------------|-------------|--------------------------|
|                      | 6,000 m) down to the Brahmaputra floodplain (200–300 m)                                                                                                                                              |             |                          |
| Lepcha               | West Bengal in India and South-Western Butan (greater Himalayan region; 1,000 m and higher)                                                                                                          | mountainous | suffixes and bound roots |
| Jahai (Jehai)        | rainforests of the Malay Peninsula (Northern Malaysia and Southern Thailand; with mountains up to about 2,180 m)                                                                                     | mountainous | roots                    |
| Muna                 | Muna (Indonesia) is a low-lying coral island (reef limestone) with hills (200 m - 400 m)                                                                                                             | lower hills | roots                    |
| Buru                 | main settlements on Buru island (Moluccas of Indonesia), which is mostly mountainous (the highest peak is Mount Kapalatmada, 2,428 m), but not all villages are in the mountains                     | mountainous | roots                    |
| Abui                 | central area of Alor island (Indonesia), which is of volcanic origin and has very rugged terrain (highest elevation is 1,423 m); the term ‘Abui’ means ‘mountains’ or alternatively ‘enclosed place’ | mountainous | roots                    |
| Blagar               | most settlements on the volcanic island of Pura (over 1,000 m), Indonesia                                                                                                                            | mountainous | roots                    |
| Makalero             | East Timor (island; highest elevation is Mount Naunuli with almost 900 m)                                                                                                                            | mountainous | roots                    |
| Tidore               | most settlements on the island of Tidore (Moluccas of Indonesia), which is dominated by a large volcano (1,730 m)                                                                                    | mountainous | roots                    |
| Daga                 | Owen Stanley Mountains of Papua New Guinea (highest peak is around 4,000 m)                                                                                                                          | mountainous | roots                    |
| Sougb                | eastern part of the Bird's Head Peninsula (mountain ranges up to almost 3,000 m) of Irian Jaya, Indonesia                                                                                            | mountainous | roots                    |
| Manambu              | East Sepik Province of Papua New Guinea, most settlements on the Sepik River                                                                                                                         | lower hills | suffixes                 |
| Taulil (Tulil)       | East New Britain Province on the island of New Britain (Papua New Guinea)                                                                                                                            | lower hills | roots                    |
| Dadibi               | mountainous area in the Southern Highlands Province of Papua New Guinea                                                                                                                              | mountainous | roots                    |
| Hatam                | Arfak mountains, Bird's Head area of Irian Jaya, Indonesia (Mount Arfak is 2,955 m)                                                                                                                  | mountainous | roots                    |
| Fore                 | Goroka District of Eastern Highlands Province (Papua New Guinea; elevations higher than 3,500 m)                                                                                                     | mountainous | roots                    |
| Yagaria, Hua dialect | Eastern Highlands Province, Papua New Guinea; highest mountain in the vicinity is Mt. Michael (3,750m)                                                                                               | mountainous | roots                    |
| Usan                 | southern slopes of the Adelbert Range in the Madang province (Papua New Guinea; highest elevation is 1,716 m)                                                                                        | mountainous | roots                    |
| Tauya                | base of the Bismark Range (up to around 1,500 m) in the Upper Ramu Valley, Madang Province (Papua New Guinea)                                                                                        | mountainous | bound roots              |
| Nungon               | vast rainforest holdings, which reach 4,000 m, on the Huon Peninsula, Morobe province of eastern Papua New Guinea                                                                                    | mountainous | roots                    |

|                              |                                                                                                                             |             |             |
|------------------------------|-----------------------------------------------------------------------------------------------------------------------------|-------------|-------------|
| Ma Manda                     | mountainous area on the Huon Peninsula, Morobe province of eastern Papua New Guinea (1,000-1,500m)                          | mountainous | roots       |
| Yupno (Yopno)                | Huon Peninsula, Morobe province of eastern Papua New Guinea; village at 2,200m                                              | mountainous | roots       |
| Eipo (Eipomek)               | eastern highlands of Eipumek District, West Papua (Indonesia); settlements and gardens at 1,300 to 2,000m                   | mountainous | bound roots |
| Yale (Kosarek Yale)          | eastern highlands of Eipumek District, West Papua (Indonesia); settlements and gardens at 1,300 to 2,000m                   | mountainous | roots       |
| Kewa (East dialect) / Kewapi | mountainous area in the Southern Highlands Province of Papua New Guinea                                                     | mountainous | roots       |
| Nêlêmwa-Nixumwak             | Northern New Caledonia, which is divided in length by a central mountain range whose highest peaks are Mont Panié (1,629 m) | mountainous | suffixes    |
| Iaai                         | Ouvéa Island (New Caledonia), consists of a flat coral atoll                                                                | flat        | roots       |
| Dyirbal                      | upper Murray river of the Atherton Tableland, which is part of the larger East Australian Cordillera (Australia)            | lower hills | suffixes    |
| Ngiyambaa                    | New South Wales (Australia), rather flat territory                                                                          | lower hills | suffixes    |

### Part 3

| Language                                  | Translations of the elevational meanings of the demonstratives                                             | Elevational values                      | Reference(s)                                                  |
|-------------------------------------------|------------------------------------------------------------------------------------------------------------|-----------------------------------------|---------------------------------------------------------------|
| Central Alaskan Yupik                     | down, up, level                                                                                            | U/D/L                                   | Holton (2018, 2019); Miyaoka (2012, pp. 345–381)              |
| Kalaallisut (West Greenlandic)            | down, up, level (Holton, 2019); above/below/inside/outside/ up coast or down coast, etc. (Fortescue, 1984) | U/D/L                                   | Fortescue (1984, pp. 259–263); terminology from Holton (2018) |
| Eastern Canadian Inuktitut (Aivilingmiut) | horizontal /over; up /vertical-superior; down /vertical-inferior                                           | U/D/L                                   | Denny (1982)                                                  |
| Tanacross                                 | above, below                                                                                               | U/D/A                                   | Holton (2000, 2018, 2019)                                     |
| Koyukon                                   | up above, down below                                                                                       | U/D/A                                   | Holton (2018, 2019); Leer (1989)                              |
| Movima                                    | elevated (no contact with the ground)                                                                      | U                                       | Haude (2006, pp. 145, 177–186)                                |
| Pacaraos Quechua                          | same level, lower, higher                                                                                  | U/D/L                                   | Adelaar (2019)                                                |
| El Nayar Cora                             | in/along slope/not on top; foot of slope; head of slope/up on top                                          | U/D/(L) [general] + U/D/A [topographic] | Casad (1982; 1984, pp. 252–262; 1985)                         |
| Zayse                                     | higher, lower                                                                                              | U/D                                     | Hayward (1990, pp. 273–275)                                   |
| Maale                                     | up, down, up there, down there, on level ground                                                            | U/D/L                                   | Amha (2001, pp. 138–141); Treis (2019)                        |
| Baskeet (Basketo)                         | up, down                                                                                                   | U/D                                     | Treis (2019)                                                  |
| Dawuro                                    | upwardly located, downwardly located, horizontally located                                                 | U/D/L                                   | Amha (2012); Woldemariam (2001)                               |
| Dime                                      | higher, lower                                                                                              | U/D                                     | Seyoum (2008, pp. 74–77)                                      |
| Avar                                      | higher, lower                                                                                              | U/D                                     | Charachidzé (1981, pp. 77–79)                                 |
| Andi                                      | higher, lower, same level                                                                                  | U/D/L                                   | Saidova (2000, p. 282)                                        |

|                                            |                                                                                                                                                |         |                                                     |
|--------------------------------------------|------------------------------------------------------------------------------------------------------------------------------------------------|---------|-----------------------------------------------------|
| Lak                                        | higher, (lower)                                                                                                                                | U/(D)   | Zhirkov (1955, p. 71); Friedman (1994)              |
| Sanzhi Dargwa                              | higher, lower                                                                                                                                  | U/D     | Forker (2019)                                       |
| Khasi                                      | up, down                                                                                                                                       | U/D     | Diessel (1999, p. 43); Rabel (1961, p. 67)          |
| Bantawa                                    | low, up, level                                                                                                                                 | U/D/L   | Doornenbal (2009, p. 95)                            |
| Yakkha                                     | up/uphill; down/downhill; across; across beyond                                                                                                | U/D/A   | Schakow (2015, pp. 183–203)                         |
| Kurtöp (Kurtokha)                          | up, down                                                                                                                                       | U/D     | Hyslop (2017, pp. 161–166)                          |
| Galo (and almost all other Tani languages) | upward (+north); downward (+south); same level (+ east, west, unknown direction)                                                               | U/D/L   | Post (2011)                                         |
| Lepcha                                     | below, lower, down, beneath / up, higher, above                                                                                                | U/D     | Plaisier (2007, pp. 68–72)                          |
| Jahai (Jehai)                              | up, down, located below speech situation (underneath, downhill, or downstream), located above speech situation (overhead, uphill, or upstream) | U/D     | Burenhult (2008, 2018)                              |
| Muna                                       | far away, higher than point of speaking or orientation                                                                                         | U       | van den Berg (1989, pp. 89–91); van den Berg (1997) |
| Buru                                       | up(ward), down(ward), upstream/toward emic center, downstream/away from emic center/far; across                                                | U/D/A   | Grimes (1991, pp. 167–173)                          |
| Abui                                       | below, above, distal (undifferentiated, level)                                                                                                 | U/D/(L) | Kratchovil (2007, pp. 111–118)                      |
| Blagar                                     | high, low, level                                                                                                                               | U/D/L   | Steinhauer (2014, p. 181, etc.); Steinhauer (1990)  |
| Makalero                                   | higher, lower, same elevation                                                                                                                  | U/D/L   | Huber (2011, pp. 232–233)                           |
| Tidore                                     | upward, downward                                                                                                                               | U/D     | von Staden (2018, 2000)                             |
| Daga                                       | high, up, higher level, low, down, lower level, same level, overhead, underneath                                                               | U/D/L   | Murane (1974, pp. 38–39)                            |
| Sougb                                      | west/up, east/down                                                                                                                             | U/D     | Reesink (2002, pp. 224–226)                         |
| Manambu                                    | up the mountain, up the river, down the mountain, down the river                                                                               | U/D     | Aikhenvald (2015)                                   |
| Taulil (Tulil)                             | up, uphill, down, downhill                                                                                                                     | U/D     | Meng (2018, pp. 239–274)                            |
| Dadibi                                     | below, down                                                                                                                                    | D       | MacDonald (1976, p. 41); Whitby (1990)              |
| Hatam                                      | sloping up, vertically up, down                                                                                                                | U1/U2/D | Reesink (1999, pp. 60–61)                           |
| Fore                                       | up, down                                                                                                                                       | U/D     | Scott (1978, pp. 82–84)                             |
| Yagaria, Hua dialect                       | uphill, downhill/below, level                                                                                                                  | U/D/(L) | Haiman (1980, p. 258–260)                           |
| Usan                                       | up, down, across                                                                                                                               | U/D/A   | Reesink (1984, pp. 68–73)                           |
| Tauya                                      | above speaker, below speaker                                                                                                                   | U/D     | MacDonald (1990, pp. 99–103)                        |
| Nungon                                     | lower, downhill, higher, uphill                                                                                                                | U/D/L   | Sarvasy (2014, pp. 404–419)                         |
| Ma Manda                                   | up, down, level                                                                                                                                | U/D/L   | Pennington (2016, pp. 268–314)                      |
| Yupno (Yopno)                              | up, down                                                                                                                                       | U/D     | Cooperrider et al. (2017); Núñez et al. (2012)      |
| Eipo (Eipomek)                             | up, down                                                                                                                                       | U/D/A   | Heeschen (1982, pp. 84–88; 1998, pp. 143–148)       |
| Yale (Kosarek Yale)                        | up, down                                                                                                                                       | U/D/A   | Heeschen (1982, pp. 89–95; )                        |

|                              |                                                                                                                                          |         |                                       |
|------------------------------|------------------------------------------------------------------------------------------------------------------------------------------|---------|---------------------------------------|
| Kewa (East dialect) / Kewapi | upward, horizontal, downward                                                                                                             | U/D/L   | Yarapea (2006, pp. 75–79)             |
| Nêlêmwa-Nixumwak             | upward, downward                                                                                                                         | U/D     | Bril (2004)                           |
| Iaai                         | down (and towards the sea), down (near speaker); up (and inland); sunset+west+towards sea+down below; sunrise+east+inland+on high ground | U/D (L) | Ozanne-Rivierre (2004)                |
| Dyirbal                      | downhill, uphill, downriver, upriver, up, down                                                                                           | U/D     | Dixon (1972, p. 48; 2003, pp. 94–101) |
| Ngiyambaa                    | up, down                                                                                                                                 | U/D     | Donaldson (1980, pp. 139–143)         |
